# Supplementary material for: Implication of the p53-Related miR-34c, -125b, and -203 in the Osteoblastic Differentiation and the Malignant Transformation of Bone Sarcomas
Source: PubMed Central journal article supplement (PMC7226610; doi:10.3390/cells9040810), 2020-03-27
Supplement: cells-09-00810-s001.pdf [file cells-09-00810-s001.pdf]

| miRNA      | p53's link                                                                      | characterization of the interaction            |                         |                                                        | reference              |                     |                            |
|------------|---------------------------------------------------------------------------------|------------------------------------------------|-------------------------|--------------------------------------------------------|------------------------|---------------------|----------------------------|
|            |                                                                                 | target gene                                    | nature of the targeting | model                                                  | authors                | date of publication | Journal                    |
| miR-125b   | conflicting data: activator of p53's expression & repressor of p53's expression | Bcl-3                                          | direct 3'UTR            | Ovarian cancer                                         | Guam et al.,           | 2011                | Int J Cancer               |
|            |                                                                                 | CBFβ                                           | direct 3'UTR            | Mesenchymal stem cells                                 | Huang et al.,          | 2014                | Biochimie                  |
|            |                                                                                 | C-Jun                                          | direct 3'UTR            | Melanoma                                               | Kappelmann et al.,     | 2013                | Oncogene                   |
|            |                                                                                 | EBF1                                           | direct 3'UTR            | Breast cancer                                          | Scott et al.,          | 2007                | J Biol Chem                |
|            |                                                                                 | ERBB2                                          | direct 3'UTR            | Ovarian cancer                                         | He et al.,             | 2013                | PLoS One                   |
|            |                                                                                 |                                                | no direct 3'UTR         | Human Umbilical Vein Endothelial Cells                 | Zhou et al.,           | 2015                | Burns                      |
|            |                                                                                 |                                                | direct 3'UTR            | Small cell lung cancer                                 | Yaghibi et al.,        | 2015                | Mol Cancer Ther.           |
|            |                                                                                 | ERBB3                                          | direct 3'UTR            | Breast cancer                                          | Scott et al.,          | 2007                | J Biol Chem                |
|            |                                                                                 |                                                | direct 3'UTR            | Ovarian cancer                                         | He et al.,             | 2013                | PLoS One                   |
|            |                                                                                 | FGFR3                                          | direct 3'UTR            | Papillary model                                        | Xu et al.,             | 2011                | J Invest Dermatol.         |
|            |                                                                                 | G0S1                                           | no direct 3'UTR         | Medulloblastoma                                        | Ferretti et al.,       | 2006                | EMBO J                     |
|            |                                                                                 | Lin-28                                         | direct 3'UTR            | Embryonal carcinoma cells                              | Wu et al.,             | 2005                | Mol Cell Biol.             |
|            |                                                                                 | MAPK27                                         | no direct 3'UTR         | Cutaneous squamous cell carcinoma                      | Xu et al.,             | 2012                | J Biol Chem                |
|            |                                                                                 | MAPK911                                        | no direct 3'UTR         | Early 8-cells                                          | Knackmuss et al.,      | 2015                | Cell Death Differ.         |
|            |                                                                                 | MMP7                                           | no direct 3'UTR         | Cutaneous squamous cell carcinoma                      | Xu et al.,             | 2011                | J Biol Chem                |
|            |                                                                                 | MMP13                                          | direct 3'UTR            | Cutaneous squamous cell carcinoma                      | Xu et al.,             | 2012                | J Biol Chem                |
|            |                                                                                 | NKIRAS2                                        | direct 3'UTR            | Bladder cancer                                         | Wu et al.,             | 2013                | Oncol Lett.                |
|            |                                                                                 |                                                | direct 3'UTR            | Glioblastoma                                           | Haemmig et al.,        | 2014                | Cell Death Dis.            |
|            |                                                                                 | Notch1                                         | direct 3'UTR            | Human primary keratinocytes                            | Manca et al.,          | 2011                | Exp Dermatol.              |
|            |                                                                                 | Paclitad                                       | no direct 3'UTR         | Medulloblastoma                                        | Ferretti et al.,       | 2007                | EMBO J                     |
|            |                                                                                 | p14 <sup>ARF</sup>                             | direct 3'UTR            | Prostate cancer                                        | Amir et al.,           | 2013                | PLoS One                   |
|            |                                                                                 | p38                                            | direct 3'UTR            | Human keratinocytes, human embryonic kidney cells      | Tan et al.,            | 2012                | J Biol Chem                |
|            |                                                                                 | p53                                            | direct 3'UTR            | Human lung fibroblasts, zebrafish brain                | Le et al.,             | 2009                | Genes Dev.                 |
|            |                                                                                 |                                                | direct 3'UTR            | Fewing Sarcoma                                         | Wu et al.,             | 2013                | Cancer Cell Int.           |
|            |                                                                                 | RUNX2                                          | no direct 3'UTR         | Rat thoracic aorta                                     | Chen et al.,           | 2013                | PLoS One                   |
|            |                                                                                 | Schnurri-2                                     | no direct 3'UTR         | Human adipose-derived stem cells                       | Zhang et al.,          | 2012                | J Cell Biochem.            |
|            |                                                                                 |                                                | no direct 3'UTR         | Leukemia                                               | Erwinich et al.,       | 2014                | Genes Dev.                 |
|            |                                                                                 | Sma2                                           | direct 3'UTR            | Hepatocellular carcinoma                               | Zhou et al.,           | 2015                | Hepatology                 |
|            |                                                                                 | Sma24                                          | direct 3'UTR            | Leukemia                                               | Erwinich et al.,       | 2014                | Genes Dev.                 |
|            |                                                                                 | Smoothend                                      | direct 3'UTR            | Cerebellar neuronal progenitors cells, medulloblastoma | Ferretti et al.,       | 2008                | EMBO J                     |
|            |                                                                                 | STAT3                                          | direct 3'UTR            | Murine bone marrow cells                               | Surdziel et al.,       | 2011                | Blood                      |
|            |                                                                                 | SIP                                            | direct 3'UTR            | Osteosarcoma                                           | Liu et al.,            | 2011                | Biochem Biophys Res Commun |
|            |                                                                                 |                                                | direct 3'UTR            | Pneumonia                                              | Li et al.,             | 2013                | Biochem Biophys Res Commun |
|            |                                                                                 | TAZ                                            | direct 3'UTR            | Hepatocellular carcinoma                               | Li et al.,             | 2015                | Oncol Lett.                |
|            |                                                                                 | TGFβR-1                                        | no direct 3'UTR         | Leukemia                                               | Erwinich et al.,       | 2014                | Genes Dev.                 |
|            |                                                                                 | YNF-α                                          | direct 3'UTR            | LPS-stimulated macrophages                             | Kim et al.,            | 2013                | Immunol Invest.            |
|            |                                                                                 | α-syn                                          | direct 3'UTR            | Human neuroblast cells                                 | Kabaria et al.,        | 2015                | FEBS Lett.                 |
|            |                                                                                 | Bcl-2                                          | direct 3'UTR            | Gastric cancer                                         | Ji et al.,             | 2008                | BMC Cancer                 |
|            |                                                                                 |                                                | no direct 3'UTR         | Prostate cancer                                        | Hagman et al.,         | 2010                | Int J Cancer               |
|            |                                                                                 | BMP-2                                          | direct 3'UTR            | Lung cancer                                            | Fotinos et al.,        | 2014                | Anticancer Res.            |
| CCND1      | direct 3'UTR                                                                    | Mouse osteoblasts                              | Wei et al.,             | 2012                                                   | J Cell Biol.           |                     |                            |
| CCND2      | no direct 3'UTR                                                                 | Gastric cancer                                 | Suzuki et al.,          | 2011                                                   | Carcinogenesis         |                     |                            |
| CCDC2A     | no direct 3'UTR                                                                 | Ovarian cancer                                 | Yuan et al.,            | 2015                                                   | Int J Clin Exp Med.    |                     |                            |
|            | no direct 3'UTR                                                                 | Gastric cancer                                 | Suzuki et al.,          | 2010                                                   | Carcinogenesis         |                     |                            |
| CDK4       | no direct 3'UTR                                                                 | Mouse osteoblasts                              | Wei et al.,             | 2012                                                   | J Cell Biol.           |                     |                            |
|            | no direct 3'UTR                                                                 | Uveal melanoma                                 | Dong et al.,            | 2012                                                   | Mol Vis.               |                     |                            |
|            | no direct 3'UTR                                                                 | Uveal melanoma                                 | Dong et al.,            | 2012                                                   | Mol Vis.               |                     |                            |
| CDK6       | no direct 3'UTR                                                                 | Uveal melanoma                                 | Dong et al.,            | 2012                                                   | Mol Vis.               |                     |                            |
|            | no direct 3'UTR                                                                 | Ovarian cancer                                 | Yuan et al.,            | 2015                                                   | Int J Clin Exp Med.    |                     |                            |
|            | no direct 3'UTR                                                                 | Gastric cancer                                 | Suzuki et al.,          | 2010                                                   | Carcinogenesis         |                     |                            |
| c-met      | direct 3'UTR                                                                    | Laryngeal carcinoma model                      | Cui et al.,             | 2010                                                   | Int J Mol Med.         |                     |                            |
|            | direct 3'UTR                                                                    | Uveal melanoma                                 | Dong et al.,            | 2012                                                   | Mol Vis.               |                     |                            |
| c-myc      | direct 3'UTR                                                                    | Cervical cancer                                | Cannell et al.,         | 2010                                                   | Proc Natl Acad Sci USA |                     |                            |
| E2F3       | no direct 3'UTR                                                                 | Prostate cancer                                | Hagman et al.,          | 2011                                                   | Int J Cancer           |                     |                            |
| JAGGED-1   | no direct 3'UTR                                                                 | Mouse                                          | Hopiel et al.,          | 2010                                                   | Gene Expr Patterns.    |                     |                            |
| JAGGED-1   | direct 3'UTR                                                                    | Osteosarcoma                                   | Xu et al.,              | 2014                                                   | Med Oncol.             |                     |                            |
| Left1      | no direct 3'UTR                                                                 | Primary mouse ovarian surface epithelium cells | Corney et al.,          | 2007                                                   | Cancer Res.            |                     |                            |
|            | no direct 3'UTR                                                                 | Colon cancer                                   | Roy et al.,             | 2012                                                   | J Hematol Oncol.       |                     |                            |
| Notch1     | direct 3'UTR                                                                    | Bone marrow stromal cells                      | Bae et al.,             | 2012                                                   | Hum Mol Genet.         |                     |                            |
|            | direct 3'UTR                                                                    | Mouse teste cells                              | Sree et al.,            | 2014                                                   | Biol Reprod.           |                     |                            |
|            | direct 3'UTR                                                                    | Osteosarcoma                                   | Xu et al.,              | 2014                                                   | Med Oncol.             |                     |                            |
| Notch2     | direct 3'UTR                                                                    | Cervical cancer                                | Bouhallier et al.,      | 2010                                                   | RNA                    |                     |                            |
|            | direct 3'UTR                                                                    | Glioblastoma                                   | Wu et al.,              | 2013                                                   | Oncol Lett.            |                     |                            |
| PKC        | no direct 3'UTR                                                                 | Hippocampal cells from mice                    | Cao et al.,             | 2014                                                   | Cell Biol Int.         |                     |                            |
|            | no direct 3'UTR                                                                 | Mouse osteoblasts                              | Zhang et al.,           | 2012                                                   | J Biol Chem.           |                     |                            |
| RUNX2      | direct 3'UTR                                                                    | Osteosarcoma                                   | Van der Deem et al.,    | 2013                                                   | J Biol Chem.           |                     |                            |
| SATB2      | direct 3'UTR                                                                    | Mouse osteoblasts                              | Wei et al.,             | 2012                                                   | J Cell Biol.           |                     |                            |
| SC7        | direct 3'UTR                                                                    | Vascular smooth muscle cells                   | Chen et al.,            | 2015                                                   | Cell Signal.           |                     |                            |
| TGFβ2      | direct 3'UTR                                                                    | Cervical cancer                                | Bouhallier et al.,      | 2010                                                   | RNA                    |                     |                            |
| TBP31      | direct 3'UTR                                                                    | Mouse osteoblasts                              | Zhang et al.,           | 2012                                                   | J Biol Chem.           |                     |                            |
| ATM        | no direct 3'UTR                                                                 | Spontaneous breast carcinomas                  | Bondoux et al.,         | 2013                                                   | Br J Cancer.           |                     |                            |
|            | direct 3'UTR                                                                    | Pancreatic carcinoma                           | Wyllner et al.,         | 2009                                                   | Nat Cell Biol.         |                     |                            |
| Bmi-1      | no direct 3'UTR                                                                 | Prostate cancer                                | Saini et al.,           | 2011                                                   | Clin Cancer Res.       |                     |                            |
|            | direct 3'UTR                                                                    | Breast cancer                                  | Yin et al.,             | 2013                                                   | PLoS One               |                     |                            |
| Bmp6r      | direct 3'UTR                                                                    | Mouse epithelial stem cells                    | Cao et al.,             | 2013                                                   | Development            |                     |                            |
| c-AM       | no direct 3'UTR                                                                 | Smooth muscle cells                            | Liao et al.,            | 2015                                                   | Physiol Rep.           |                     |                            |
| CDK6       | no direct 3'UTR                                                                 | Oesophageal cancer                             | Zhang et al.,           | 2014                                                   | J Cell Physiol.        |                     |                            |
|            | no direct 3'UTR                                                                 | Ovarian cancer                                 | Yuan et al.,            | 2015                                                   | Int J Clin Exp Med.    |                     |                            |
| c-Jun      | direct 3'UTR                                                                    | Basal cell carcinoma                           | Sonkoly et al.,         | 2012                                                   | Oncogenesis            |                     |                            |
|            | direct 3'UTR                                                                    | Chicken fibroblasts                            | Luo et al.,             | 2014                                                   | Cell Death Dis.        |                     |                            |
|            | direct 3'UTR                                                                    | Cervical myelon cells                          | Triggiani et al.,       | 2014                                                   | J Biomed Sci.          |                     |                            |
| CREB1      | direct 3'UTR                                                                    | Multiple myeloma                               | Wong et al.,            | 2011                                                   | Br J Haematol.         |                     |                            |
| Dks        | direct 3'UTR                                                                    | Canine and human melanoma                      | Nguchi et al.,          | 2014                                                   | Vert Comp Oncol.       |                     |                            |
|            | direct 3'UTR                                                                    | Prostate cancer                                | Saini et al.,           | 2011                                                   | Clin Cancer Res.       |                     |                            |
| FGF2       | direct 3'UTR                                                                    | Benal cancer                                   | Xu et al.,              | 2015                                                   | Diagn. Pathol.         |                     |                            |
| Friszled-2 | no direct 3'UTR                                                                 | Lung carcinoma                                 | Mine et al.,            | 2015                                                   | PLoS One               |                     |                            |
| HES1       | no direct 3'UTR                                                                 | Rhabdomyosarcoma                               | Osai et al.,            | 2014                                                   | J Biol Chem.           |                     |                            |
| IL-22      | direct 3'UTR                                                                    | Oral biopsies from Oral Lichen Planus          | Shen et al.,            | 2015                                                   | J Oral Pathol Med.     |                     |                            |
| JAGGED-1   | no direct 3'UTR                                                                 | Rhabdomyosarcoma                               | Diao et al.,            | 2014                                                   | J Biol Chem.           |                     |                            |
| Left1      | direct 3'UTR                                                                    | Zebrafish                                      | Huthcher et al.,        | 2008                                                   | Proc Natl Acad Sci USA |                     |                            |
| LFR        | no direct 3'UTR                                                                 | Rhabdomyosarcoma                               | Diao et al.,            | 2014                                                   | J Biol Chem.           |                     |                            |
| PKCα       | direct 3'UTR                                                                    | Lung cancer                                    | Wang et al.,            | 2013                                                   | PLoS One               |                     |                            |
| p63        | direct 3'UTR                                                                    | Human mouse zebrafish                          | Yi et al.,              | 2008                                                   | Nature                 |                     |                            |
| Rap1A      | direct 3'UTR                                                                    | Prostate cancer                                | Xiang et al.,           | 2015                                                   | J Exp Clin Cancer Res. |                     |                            |
| RUNX2      | direct 3'UTR                                                                    | Prostate cancer                                | Saini et al.,           | 2011                                                   | Clin Cancer Res.       |                     |                            |
| Sng        | direct 3'UTR                                                                    | Gastric carcinoma                              | Shi et al.,             | 2015                                                   | Tumour Biol.           |                     |                            |
| Sma24      | direct 3'UTR                                                                    | Prostate cancer                                | Saini et al.,           | 2011                                                   | Clin Cancer Res.       |                     |                            |
| SPARC      | direct 3'UTR                                                                    | Head and neck squamous cell carcinoma          | Benaich et al.,         | 2014                                                   | Cell rep.              |                     |                            |
| SRC        | direct 3'UTR                                                                    | Lung cancer                                    | Wang et al.,            | 2014                                                   | PLoS One               |                     |                            |
| Survivin   | direct 3'UTR                                                                    | Prostate cancer                                | Saini et al.,           | 2011                                                   | Clin Cancer Res.       |                     |                            |
| VEGFA      | direct 3'UTR                                                                    | Bladder cancer                                 | Zhang et al.,           | 2015                                                   | PLoS One               |                     |                            |
| ZEB1       | direct 3'UTR                                                                    | Cervical cancer                                | Zhu et al.,             | 2013                                                   | Cell Physiol Biochem.  |                     |                            |
| ZEB2       | direct 3'UTR                                                                    | Prostate cancer                                | Saini et al.,           | 2011                                                   | Clin Cancer Res.       |                     |                            |

**Supplementary Table S1.** The p53-related miRNAs and the nature of the interaction with their target genes. The p53-related miRNAs and their target genes are summarized and the target genes are classified in alphabetical order. The nature of the interaction is defined as a direct/indirect interaction between the miRNA and the target mRNA. A direct interaction is shown as validated if the authors performed luciferase assay through a 3'UTR-reporter system. The authors, the date of publication, and the journals are also listed among all the references of this review.
